# Supplementary material for: Photo-Polymerization Damage Protection by Hydrogen Sulfide Donors for 3D-Cell Culture Systems Optimization
Source: MDPI journal article supplement (doi:10.3390/ijms22116095), 2021-06-05
Supplement: s1 [file s1]

Supplementary Materials

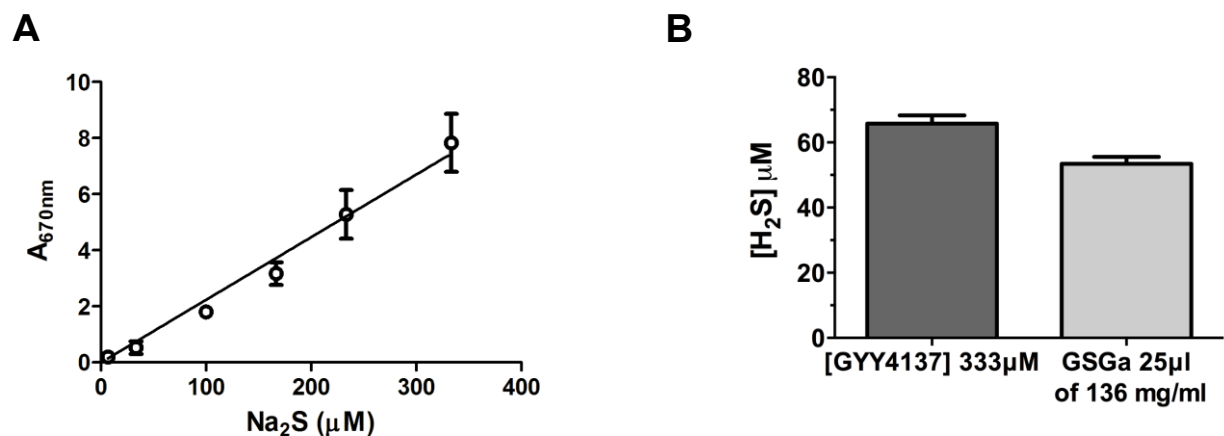

**Figure S1. Calibration curve of H<sub>2</sub>S-release.** **A)** Calibration curve of H<sub>2</sub>S release obtained using different concentrations of Na<sub>2</sub>S. **B)** Amount (in μM) of H<sub>2</sub>S released by 333 μM GYY4137 and 25 μl of GSGa (136 mg d.w./ml); measured by MB assay and spectrophotometric analysis.

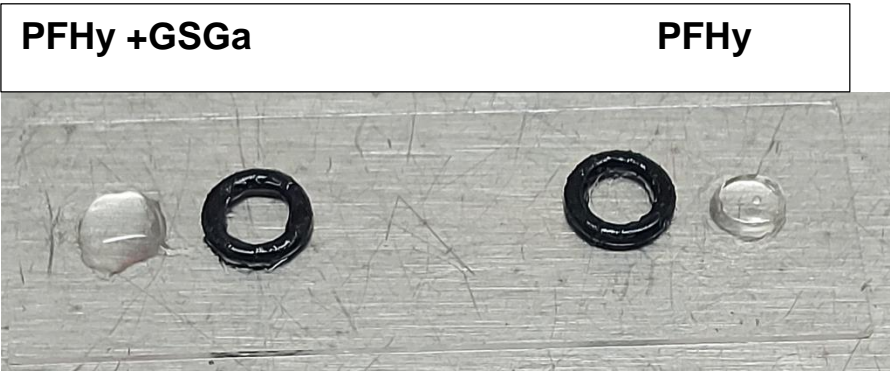

**Figure S2. Inhibition of the PFHy photopolymerization by GSGa.** PFHy (50μL) preparation in the presence and in the absence of GSGa (31.5 μg d.w./ 5μL).

**cMSC**

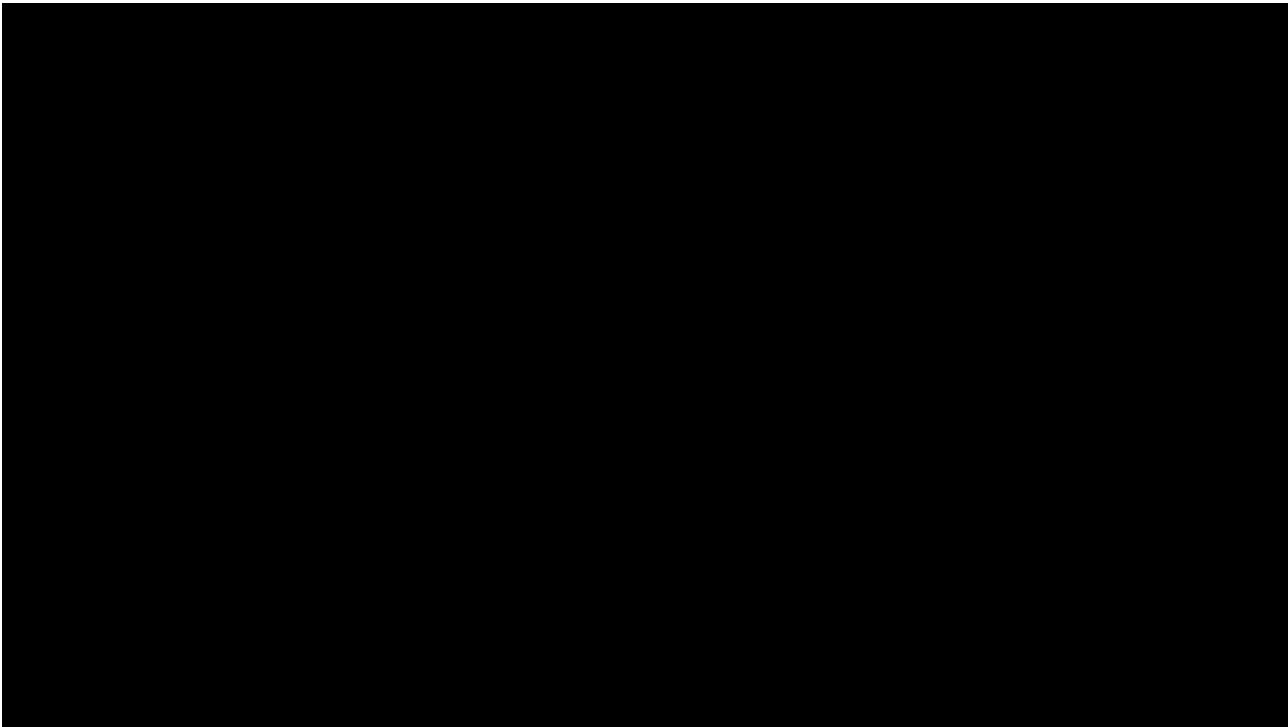

**GSGa-cMSC**

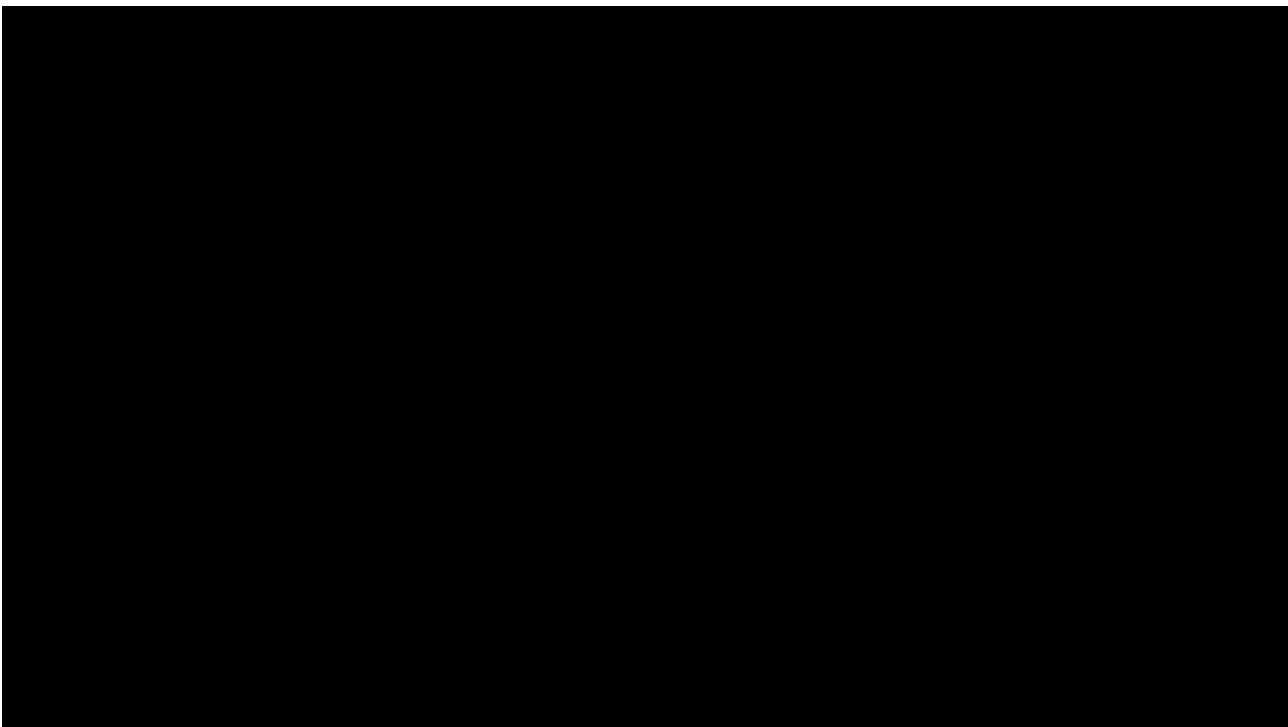

**Video of bright field microscopic analysis** of cMSC and GSGa pre-treated cMSC embedded in 3D-PFH<sub>y</sub> and cultured for 7 days.
